# Supplementary material
Source: PubMed Central journal article supplement (PMC3156184)
Supplement: 1104261108_pnas.201104261SI.pdf [file 1104261108_pnas.201104261SI.pdf]

# Supporting Information

Svensson et al. 10.1073/pnas.1104261108

## SI Materials and Methods

**Antibodies, Peptides, and Chemicals.** Anti-p-ERK-1/2 and anti-ERK1/2 antibodies were from Cell Signaling Technology; anti-CD31, CD81, CD63, calnexin,  $\beta$ -actin,  $\alpha$ -tubulin, and  $\alpha$ V $\beta$ 3 mouse monoclonal antibodies as well as goat polyclonal anti-HB-EGF blocking antibody (no. 16783) were from Abcam. Anti-PAR-2 (no. 13504), PAR-1 (no. 13503), and TF (no. 80952) monoclonal mouse antibodies were from Santa Cruz Biotechnology. Rabbit polyclonal anti-PAR-2 antibody was from the same source as described (1). Goat polyclonal anti-TF antibody (no. AF2339), human phosphokinase antibody array (no. ARY003), and human angiogenesis array (no. ARY007) kits were from R&D Systems. NAPc2 was the same as previously described (2). Phalloidin-TRITC, Hoechst 33342, and fluorophore-conjugated secondary antibodies were from Invitrogen; and Ac-LDL was from Harbor Bio-Products. Specific agonist peptides for PAR-1 (TFLLRNPNDK) and PAR-2 (SLIGKV) were from Innovagen. siRNA for PAR-2 (F2RL1) and a nonspecific, scrambled siRNA (silencer negative control) were from Ambion. IMUBIND TF ELISA kit and Actichrome TF activity assay kit, as well as recombinant human factors VIIa and Xa, were from American Diagnostica. MEK/ERK1/2 inhibitor UO126 was from Selleck Chemicals and [ $^3$ H]thymidine was from Amersham. Growth factor reduced Matrigel and transwell 8- $\mu$ m pore size cell culture inserts were from BD. LDH assay kit, fine-grade chemicals, cell media, and supplements were from Sigma Chemical.

**qRT-PCR.** Extraction of RNA was achieved by using a GenElute Mammalian total RNA kit (Sigma) and cDNA synthesis was performed with RevertAid H Minus First Strand cDNA Synthesis Kit (Fermentas). cDNA was used for quantitative PCR based on SYBR green I chemistry (Sigma) in an ABI Prism 7900 HT machine (Applied Biosystems). The following primers were used: PAR-1, forward, 5'-GTTGGGTCTGAATTGTGTCGC-3'; reverse, 5'-GGACTGCATGGGATACACCA-3'; PAR-2, forward, 5'-GGGTTTGCCAAGTAACGGC-3'; reverse, 5'-GGGAACAGATGACAGAGAGG-3'; HB-EGF, forward, 5'-CATCTGTCTGTCTGCTGGTCA-3'; reverse, 5'-CAATCCTAGACGGCAACTGG-3'; TF, forward, 5'-TTTTAAGAGGATAGAATACATGGAAACG-3'; reverse, 5'-AACAGGTCATATCAAGAGTTTTTTGAAC-3'. Reference was as follows: EDF-1, forward, 5'-TTCAAGAAATGGGCTGCT-3'; reverse, 5'-CCGTCCGC-TCTCATAGTCC-3', which was stable at hypoxic conditions and used for normalization. The comparative Ct method was used for relative quantification of gene expression on triplicates of each reaction.

**Immunoblot Analysis.** Cells were washed with ice-cold PBS solution and lysed in a reducing RIPA buffer containing 20 mM Tris-HCl (pH 7.5), 150 mM NaCl, 1 mM Na<sub>2</sub>EDTA, 1 mM EGTA, 1% Nonidet P-40, 1% sodium deoxycholate, 2.5 mM sodium pyrophosphate, 1 mM  $\beta$ -glycerophosphate, 1 mM Na<sub>3</sub>VO<sub>4</sub>, 1  $\mu$ g/mL leupeptin, and Complete Mini Protease Inhibitor Mixture (Roche Diagnostics). For antibodies requiring nonreduced conditions (CD63 and CD81), samples were lysed in 1% Triton-X buffer supplemented with Complete Mini Protease Inhibitor Mixture. Protein concentration was determined by using the BCA Protein Assay Kit (Pierce), and equal amounts of protein were fractionated by electrophoresis in a 4% to 12% polyacrylamide-SDS gel. Proteins were blotted to PVDF membrane and probed with the indicated antibodies followed by HRP-conjugated secondary IgG antibodies for 1 h at room tempera-

ture. Visualization was performed by using the ECL Western blotting substrate (Pierce), and the membranes were exposed to X-ray film (Hyperfilm MP; Amersham). Blots were analyzed and quantified by using ImageJ software (National Institutes of Health) with  $\beta$ -actin or  $\alpha$ -tubulin as loading controls.

**Phosphokinase and Angiogenesis Arrays.** HUVECs were seeded in 80-cm<sup>2</sup> dishes and incubated in normoxia or hypoxia for 24 h, followed by starvation for 16 h in serum-free medium. Cells were untreated or stimulated with PAR-2AP for 5 min for phosphokinase array and 6 h for angiogenesis array before lysate collection. In MAPK inhibition experiments, cells were treated with 50  $\mu$ M UO126 or with DMSO in controls for 3 h before stimulation with PAR-2AP. Levels of phosphorylated or nonphosphorylated proteins (200  $\mu$ g per sample) were analyzed in cell lysates according to the protocol provided by the manufacturer. The arrays were analyzed and quantified by using ImageJ software (National Institutes of Health).

**Flow Cytometry.** HUVECs were detached with concentrated PBS solution (2 $\times$ )/0.5 mM EDTA, washed with PBS solution/BSA 1% (wt/vol), and incubated with mouse monoclonal anti-PAR-2 antibody (1:200; no. 13504; Santa Cruz). Cells were washed in PBS solution/BSA and incubated with Alexa Fluor-488-conjugated goat anti-mouse antibody (1:200; Invitrogen). All antibody incubations were performed in PBS solution/BSA for 30 min on ice. Finally, HUVECs were washed in PBS solution/BSA and analyzed by flow cytometry on a FACSCalibur instrument integrated with Cell-Quest software (BD Biosciences). Controls without PAR-2 primary antibody were included in all experiments.

**TF ELISA.** TF levels were analyzed in cell media according to the protocol provided by the manufacturer. Analysis of human TF levels was performed in plasma from mice inoculated with U-87 MG s.c. xenografts as described previously (3).

**TF Actichrome Assay.** TF activity was analyzed in cell media or in purified MV fractions according to the protocol provided by the manufacturer. Samples were incubated at 37  $^{\circ}$ C with or without 10 nM VIIa and 50 nM X. Aliquots of the incubation medium were quenched with 100 mM EDTA, and the Xa activity was determined by hydrolysis of the chromogenic substrate Spectrozyme FXa in a plate reader.

**RNA Interference.** Subconfluent cells in serum-free medium were transfected with 100 nM predesigned PAR-2 siRNA (F2RL1; ID 1960; Ambion) or control, scrambled siRNA (silencer negative control siRNA no. 1; Ambion) with Lipofectamine 2000 reagent (Invitrogen) as recommended by the manufacturer. After 5 h of transfection, cells were washed twice with 1 M NaCl, and medium was changed to growth medium, followed by another incubation period of 16 h before the tube formation and LDH assays as described later.

**Matrigel Tube Formation Assay.** HUVECs were untransfected or transfected with siRNA for PAR-2, or a scrambled siRNA sequence, followed by the tube formation assay by using growth factor-reduced Matrigel (4). Briefly, transfected HUVECs were seeded on polymerized Matrigel, and tubes were allowed to form during 16 h at normoxia, followed by incubation at normoxia or hypoxia for another 24 h. HUVEC tubes were captured using a Leitz Fluovert FS microscope equipped with a 4 $\times$  objective and a digital camera.
